# Supplementary material for: CTP Synthase 1 Is a Novel Therapeutic Target in Lymphoma
Source: PubMed Central journal article supplement — Hemasphere. 2023 Mar 28;7(4):e864. doi: 10.1097/HS9.0000000000000864 (PMC10060080; doi:10.1097/hs9.0000000000000864), 2023-03-28

**Supplementary Table 1. STP-B *in vitro* relative IC<sub>50</sub> values for 199 cancer cell lines.**

| Cell Line  | Tissue         | IC <sub>50</sub> (μM) | Cell Line    | Tissue         | IC <sub>50</sub> (μM) |
|------------|----------------|-----------------------|--------------|----------------|-----------------------|
| KU-19-19   | Bladder        | 0.044                 | OCI-LY7      | Haem, lymphoid | 0.004                 |
| 1218       | Bladder        | 0.113                 | L-363        | Haem, lymphoid | 0.005                 |
| 1352       | Bladder        | 0.467                 | OCI-LY18     | Haem, lymphoid | 0.015                 |
| 5637       | Bladder        | 0.65                  | MOLT-4       | Haem, lymphoid | 0.016                 |
| 1036       | Bladder        | 1.559                 | MOLT-3       | Haem, lymphoid | 0.017                 |
| MDA-MB-453 | Breast         | 0.025                 | JURKAT       | Haem, lymphoid | 0.023                 |
| MCF7       | Breast         | 0.035                 | RCH-ACV      | Haem, lymphoid | 0.024                 |
| SK-BR-3    | breast         | 0.039                 | MM.1R        | Haem, lymphoid | 0.025                 |
| CAL-51     | Breast         | 0.103                 | RAMOS        | Haem, lymphoid | 0.028                 |
| sMCF 10A   | Breast         | 0.268                 | EJM          | Haem, lymphoid | 0.032                 |
| MDA-MB-468 | Breast         | 1.935                 | HUT-78       | Haem, lymphoid | 0.033                 |
| MX1        | Breast         | 4.572                 | SU-DHL-1     | Haem, lymphoid | 0.042                 |
| BT-474     | breast         | 10                    | KM-H2        | Haem, lymphoid | 0.051                 |
| 401        | Breast         | 10                    | MEC-1        | Haem, lymphoid | 0.057                 |
| BT-549     | Breast         | 10                    | SD-1         | Haem, lymphoid | 0.061                 |
| ZR-75-1    | Breast         | 10                    | MOLP-2       | Haem, lymphoid | 0.068                 |
| SW756      | Cervical       | 0.141                 | CCRF-CEM     | Haem, lymphoid | 0.075                 |
| DoTc2 4510 | Cervical       | 10                    | MM.1S        | Haem, lymphoid | 0.076                 |
| HeLa       | Cervical       | 10                    | DND-39       | Haem, lymphoid | 0.084                 |
| A-172      | CNS            | 2.234                 | RAJI         | Haem, lymphoid | 0.085                 |
| SF-268     | CNS            | 4.04                  | SR-786       | Haem, lymphoid | 0.107                 |
| 498        | CNS            | 10                    | Daudi        | Haem, lymphoid | 0.111                 |
| SNB-75     | CNS            | 10                    | OPM-2        | Haem, lymphoid | 0.116                 |
| U-87 MG    | CNS            | 10                    | LP-1         | Haem, lymphoid | 0.164                 |
| 1103       | Colon          | 0.064                 | CCRF-CEM-VCR | Haem, lymphoid | 0.183                 |
| 280        | Colon          | 0.085                 | NCI-H929     | Haem, lymphoid | 0.197                 |
| 269        | Colon          | 0.111                 | RPMI 8226    | Haem, lymphoid | 0.347                 |
| SW-620     | Colon          | 0.122                 | SU-DHL-4     | Haem, lymphoid | 0.356                 |
| 94         | Colon          | 0.199                 | WSU-DLCL2    | Haem, lymphoid | 1.563                 |
| LS 174T    | Colon          | 0.231                 | MINO         | Haem, lymphoid | 1.68                  |
| Caco-2     | Colon          | 0.25                  | U-266        | Haem, lymphoid | 3.016                 |
| DLD-1      | Colon          | 10                    | IM-9         | Haem, lymphoid | 3.585                 |
| EFE-184    | Endometrial    | 0.197                 | Kasumi-1     | Haem, myeloid  | 0.006                 |
| SK-UT-1B   | Endometrial    | 1.433                 | EOL-1        | Haem, myeloid  | 0.008                 |
| 1138       | Endometrial    | 10                    | MOLM-6       | Haem, myeloid  | 0.02                  |
| HEC-1A     | Endometrial    | 10                    | U-937        | Haem, myeloid  | 0.021                 |
| KLE        | Endometrial    | 10                    | OCI-AML3     | Haem, myeloid  | 0.027                 |
|            |                |                       | KG-1a        | Haem, myeloid  | 0.037                 |
| 3023       | Gastric        | 0.025                 | JURL-MK1     | Haem, myeloid  | 0.043                 |
| 3011       | Gastric        | 0.057                 | K-562        | Haem, myeloid  | 0.043                 |
| 251        | Gastric        | 0.369                 | THP-1        | Haem, myeloid  | 0.044                 |
| 23132      | Gastric        | 0.564                 | EM-2         | Haem, myeloid  | 0.048                 |
| 1172       | Gastric        | 0.752                 | KCL-22       | Haem, myeloid  | 0.054                 |
| 3013       | Gastric        | 0.917                 | MOLM-1       | Haem, myeloid  | 0.057                 |
| 3067       | Gastric        | 9.835                 | OCI-AML2     | Haem, myeloid  | 0.062                 |
| FU97       | Gastric        | 10                    | UOC-M1       | Haem, myeloid  | 0.066                 |
| MKN7       | Gastric        | 10                    | MOLM-13      | Haem, myeloid  | 0.076                 |
| NUGC-4     | Gastric        | 10                    | KG-1         | Haem, myeloid  | 0.095                 |
| HH         | Haem, lymphoid | 0.002                 | MV4-11       | Haem, myeloid  | 0.104                 |
| NALM-33    | Haem, lymphoid | 0.003                 | PL-21        | Haem, myeloid  | 0.117                 |

| Cell Line   | Tissue        | IC50 (μM) | Cell Line | Tissue        | IC50 (μM) |
|-------------|---------------|-----------|-----------|---------------|-----------|
| PL-21       | Haem, myeloid | 0.117     | Malme-3M  | Melanoma      | 10        |
| HL-60       | Haem, myeloid | 0.118     | MSTO-211H | Mesothelioma  | 0.053     |
| NOMO-1      | Haem, myeloid | 0.611     | 698       | Mesothelioma  | 0.061     |
| JURL-MK2    | Haem, myeloid | 0.649     | 1118      | Mesothelioma  | 10        |
| MEG-01      | Haem, myeloid | 1.268     | 1752      | Mesothelioma  | 10        |
| SNU-398     | Hepatic       | 0.289     | SH-SY5Y   | Neuroblastoma | 0.036     |
| JHH-6       | Hepatic       | 1.892     | SK-N-AS   | Neuroblastoma | 0.041     |
| 575         | Hepatic       | 8.384     | SK-N-MC   | Neuroblastoma | 0.293     |
| SNU-449     | Hepatic       | 10        | CHP-212   | Neuroblastoma | 10        |
| SNU-475     | Hepatic       | 10        | OE21      | Oesophagus    | 0.054     |
| Hep G2      | Hepatic       | 10        | KYSE-70   | Oesophagus    | 0.094     |
| SK-HEP-1    | Hepatic       | 10        | OVCAR-5   | Ovarian       | 0.035     |
| 1859        | HNSSC         | 0.032     | 899       | Ovarian       | 0.04      |
| RPMI-2650   | HNSSC         | 1.443     | SK-OV-3   | Ovarian       | 0.064     |
| CAL-27      | HNSSC         | 2.676     | OVCAR-8   | Ovarian       | 0.093     |
| 1853        | HNSSC         | 10        | A2780     | Ovarian       | 0.116     |
| Detroit 562 | HNSSC         | 10        | OVCAR-4   | Ovarian       | 5.828     |
| FaDu        | HNSSC         | 10        | 1023      | Ovarian       | 10        |
| 2184        | Lung          | 0.008     | EFO-21    | Ovarian       | 10        |
| 430         | Lung          | 0.032     | BxPC-3    | Pancreas      | 0.042     |
| 1121        | Lung          | 0.04      | 1997      | Pancreas      | 0.05      |
| 66          | Lung          | 0.044     | CAPAN-2   | Pancreas      | 0.091     |
| 526         | Lung          | 0.058     | 2059      | Pancreas      | 0.101     |
| 1674        | Lung          | 0.081     | HUP-T3    | Pancreas      | 0.103     |
| NCI-H1299   | Lung          | 0.131     | 1998      | Pancreas      | 0.165     |
| 2478        | Lung          | 0.132     | PANC-1    | Pancreas      | 0.51      |
| NCI-H1975   | Lung          | 0.181     | YAPC      | Pancreas      | 0.706     |
| 1647        | Lung          | 0.522     | 2035      | Pancreas      | 2.249     |
| EKVX        | Lung          | 0.71      | 1657      | Pancreas      | 10        |
| DMS 273     | Lung          | 0.998     | 1986      | Pancreas      | 10        |
| NCI-H322M   | Lung          | 1.384     | 2005      | Pancreas      | 10        |
| NCI-H460    | Lung          | 1.461     | 22Rv1     | Prostate      | 0.054     |
| A549        | Lung          | 3.273     | LNCaP     | Prostate      | 2.812     |
| 586         | Lung          | 6.654     | 486       | Renal         | 0.073     |
| 289         | Lung          | 10        | 1220      | Renal         | 0.089     |
| 623         | Lung          | 10        | SN12C     | Renal         | 0.104     |
| 1072        | Lung          | 10        | 1183      | Renal         | 0.209     |
| NCI-H727    | Lung          | 10        | 2516      | Renal         | 0.421     |
| SCLC-21H    | Lung          | 10        | A-498     | Renal         | 0.545     |
| 2090        | Melanoma      | 0.013     | 1781      | Renal         | 0.616     |
| 1829        | Melanoma      | 0.03      | TK-10     | Renal         | 5.143     |
| UACC-257    | Melanoma      | 0.072     | 2282      | Renal         | 5.293     |
| A-375       | Melanoma      | 0.093     | 393       | Renal         | 10        |
| C32         | Melanoma      | 0.157     | 1301      | Sarcoma       | 0.016     |
| 1539        | Melanoma      | 0.206     | HT-1080   | Sarcoma       | 0.061     |
| 2106        | Melanoma      | 0.221     | 678       | Sarcoma       | 0.102     |
| 1341        | Melanoma      | 0.226     | A-204     | Sarcoma       | 0.113     |
| MDA-MB-435  | Melanoma      | 0.238     | SK-LMS-1  | Sarcoma       | 2.518     |
| 274         | Melanoma      | 0.379     | RD-ES     | Sarcoma       | 10        |
| 1737        | Melanoma      | 10        | A-431     | Vulval        | 0.113     |

**Supplementary Figure 1. Representative IC<sub>50</sub> curves for STP-B, recombinant enzyme inhibition assay.** Graphs show data from one representative experiment; see Table 1 for the total number of experiments performed.

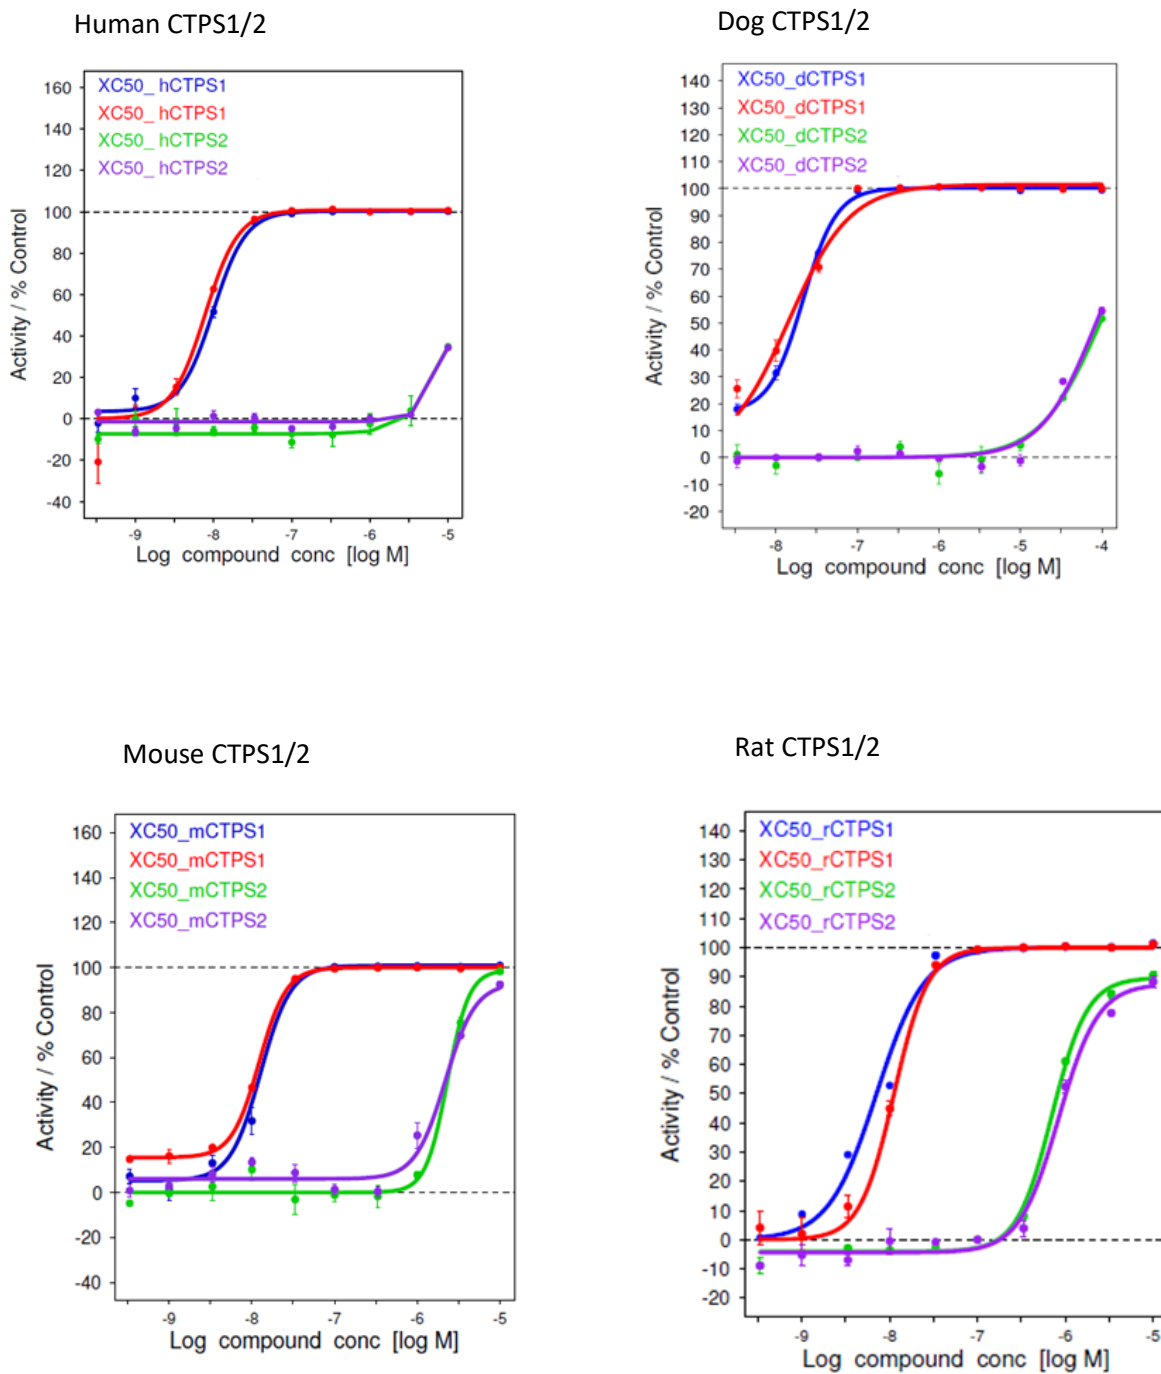

Supplementary Figure 2A. Mouse body weight change during JURKAT *in vivo* efficacy study. Related to Figure 3B.

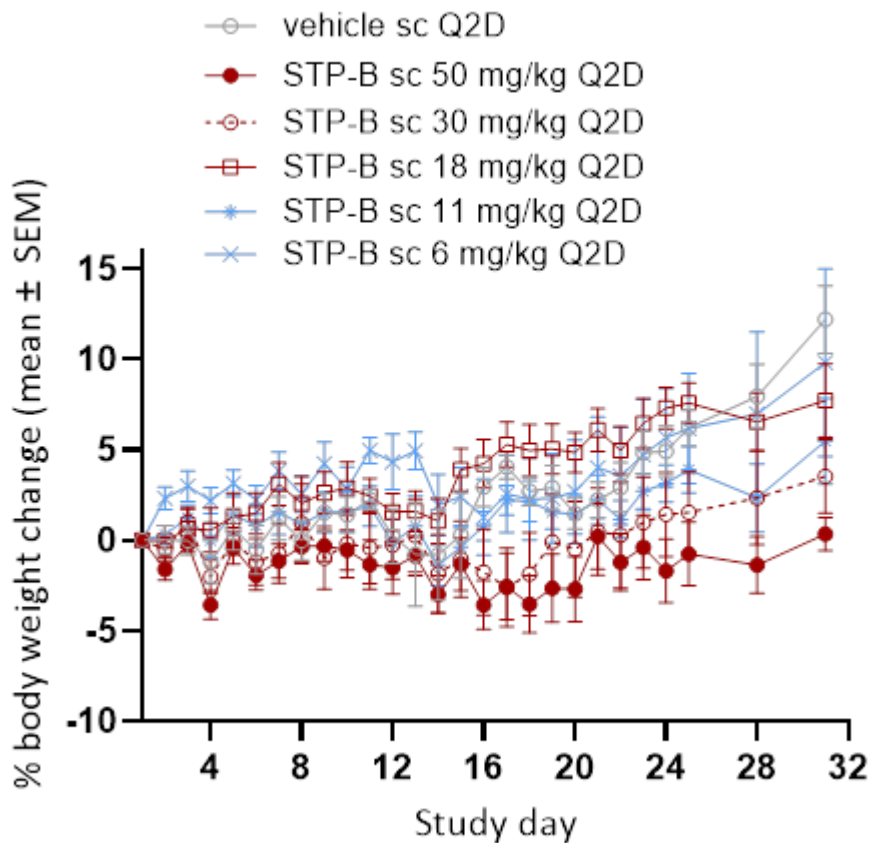

Supplementary Figure 2B. Mouse body weight change during JEKO-1 *in vivo* efficacy study. Related to Figure 3A.

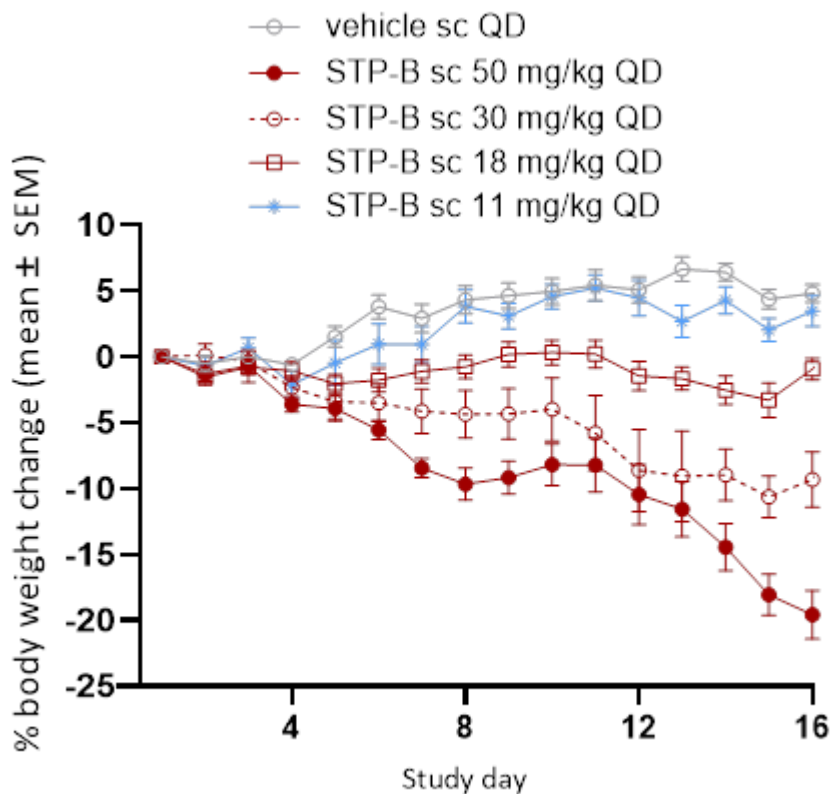

Supplement: hs9-7-e864-s001.pdf [file hs9-7-e864-s001.pdf]
